# Supplementary material
Source: PubMed Central journal article supplement (PMC4389747)
Supplement: 12248_2014_9657_MOESM1_ESM.pdf [file 12248_2014_9657_MOESM1_ESM.pdf]

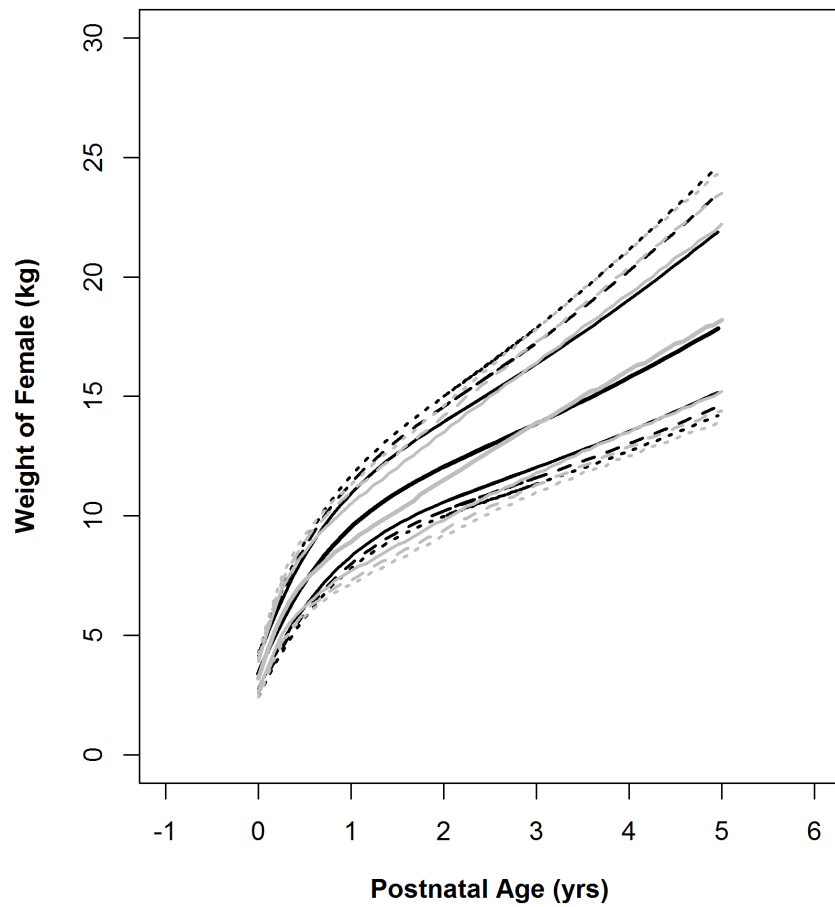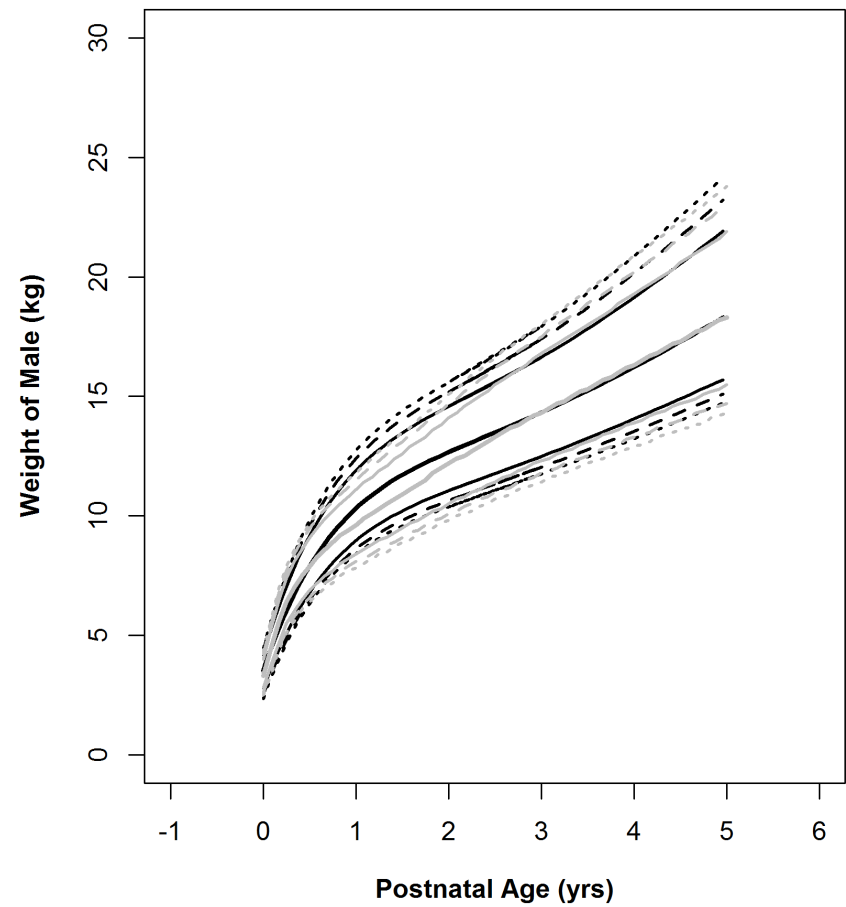

Overlay of CDC (black) and WHO (grey) datasets showing that the CDC survey tended to lean on the heavier side for children between 0.5 and 2.5 years of age than that of the WHO. Lines represent various percentiles: —, median; — — —, 80% confidence interval (CI); — — —, 90% CI; ....., 95% CI of CDC and WHO growth charts. Source data from Center for Disease Control.
